# Supplementary material for: The Impact of Environmental Pollution on the Health of Middle-Aged and Older Adults in China
Source: Research Square preprint supplement (doi:10.21203/rs.3.rs-301066/v1), 2021-03-22
Supplement: Supplementary file 1 [file 12a77055b29cf49f276dede7.docx]

**Supplemental Material**

**The impact of environmental pollution on the health of middle-aged and older adults in China**

**Table of Contents**

Table 5 The effects of environmental pollution by age group.

Table 6 The effects of environmental pollution by sex group.

Table 7 The effects of environmental pollution by household income group.

Table 8 The effects of environmental pollution by residential area group.

Table 5 The effects of environmental pollution by age group.

| Variables | 45-59 | | |  | 60-74 | | |  | 75+ | | |
| --- | --- | --- | --- | --- | --- | --- | --- | --- | --- | --- | --- |
| (1) | (2) | (3) |  | (4)  （2） | (5) | (6) |  | (7)  （2） | (8) | (9) |
| SO2 | 0.0039*** |  |  |  | 0.0074*** |  |  |  | 0.0061*** |  |  |
| (0.0007) |  |  |  | (0.0006) |  |  |  | (0.0014) |  |  |
| PM |  | 0.0171*** |  |  |  | 0.0407*** |  |  |  | 0.0316*** |  |
|  | (0.0042) |  |  |  | (0.0036) |  |  |  | (0.0073) |  |
| Wastewater |  |  | 0.0192 |  |  |  | 0.1153**** |  |  |  | 0.0299 |
|  |  | (0.0284) |  |  |  | (0.0245) |  |  |  | (0.0352) |
| Control variables | Yes | Yes | Yes |  | Yes | Yes | Yes |  | Yes | Yes | Yes |
| Wald test | 76.04*** | 77.90*** | 62.53*** |  | 322.39*** | 274.87*** | 262.56*** |  | 111.47*** | 116.57*** | 125.59*** |
| (p=0.000) | (p=0.000) | (p=0.000) |  | (p=0.000) | (p=0.000) | (p=0.000) |  | (p=0.000) | (p=0.000) | (p=0.000) |
| N | 28,714 | | |  | 22,346 | | |  | 6,831 | | |

Note: *** P < 0.01, ** P < 0.05, * P < 0.1. Clustered-robust standard errors are in parentheses. The other control variables were the same as shown in Table 2.

Table 6 The effects of environmental pollution by sex group.

| Variables | Male | | |  | Female | | |
| --- | --- | --- | --- | --- | --- | --- | --- |
| (1) | (2) | (3) |  | (4)  （2） | (5) | (6) |
| SO2 | 0.0052*** |  |  |  | 0.0066*** |  |  |
| (0.0006) |  |  |  | (0.0005) |  |  |
| PM |  | 0.0258*** |  |  |  | 0.0330*** |  |
|  | (0.0036) |  |  |  | (0.0033) |  |
| Wastewater |  |  | 0.0458** |  |  |  | 0.0971*** |
|  |  | (0.0211) |  |  |  | (0.0223) |
| Control variables | Yes | Yes | Yes |  | Yes | Yes | Yes |
| Wald test | 301.20*** | 254.08*** | 217.99*** |  | 318.09*** | 257.32*** | 212.70*** |
| (p=0.000) | (p=0.000) | (p=0.000) |  | (p=0.000) | (p=0.000) | (p=0.000) |
| N | 27,530 | | |  | 30,361 | | |

Note: *** P < 0.01, ** P < 0.05, * P < 0.1. Clustered-robust standard errors are in parentheses. The other control variables were the same as shown in Table 2.

Table 7 The effects of environmental pollution by household income group.

| Variables | Low income | | |  | High income | | |
| --- | --- | --- | --- | --- | --- | --- | --- |
| (1) | (2) | (3) |  | (4)  （2） | (5) | (6) |
| SO2 | 0.0060*** |  |  |  | 0.0031 |  |  |
| (0.0012) |  |  |  | (0.0026) |  |  |
| PM |  | 0.0267*** |  |  |  | 0.0062 |  |
|  | (0.0069) |  |  |  | (0.0139) |  |
| Wastewater |  |  | 0.1551*** |  |  |  | -0.0151 |
|  |  | (0.0424) |  |  |  | (0.0659) |
| Control variables | Yes | Yes | Yes |  | Yes | Yes | Yes |
| Wald test | 67.56*** | 56.12*** | 65.14*** |  | 22.02** | 22.18** | 35.59*** |
| (p=0.000) | (p=0.000) | (p=0.000) |  | (p=0.048) | (p=0.039) | (p=0.000) |
| N | 40,001 | | |  | 17,890 | | |

Note: *** P < 0.01, ** P < 0.05, * P < 0.1. Clustered-robust standard errors are in parentheses. The other control variables were the same as shown in Table 2.

Table 8 The effects of environmental pollution by residential area group.

| Variables | Urban | | |  | Rural | | |
| --- | --- | --- | --- | --- | --- | --- | --- |
| (1) | (2) | (3) |  | (4)  （2） | (5) | (6) |
| SO2 | 0.0066*** |  |  |  | 0.0061*** |  |  |
| (0.0006) |  |  |  | (0.0005) |  |  |
| PM |  | 0.0373*** |  |  |  | 0.0263*** |  |
|  | (0.0033) |  |  |  | (0.0035) |  |
| Wastewater |  |  | 0.1224*** |  |  |  | 0.0413** |
|  |  | (0.0247) |  |  |  | (0.0192) |
| Control variables | Yes | Yes | Yes |  | Yes | Yes | Yes |
| Wald test | 317.22*** | 327.44*** | 219.02*** |  | 279.67*** | 284.02*** | 151.89*** |
| (p=0.000) | (p=0.000) | (p=0.000) |  | (p=0.000) | (p=0.000) | (p=0.000) |
| N | 34,313 | | |  | 23,578 | | |

Note: *** P < 0.01, ** P < 0.05, * P < 0.1. Clustered-robust standard errors are in parentheses. The other control variables were the same as shown in Table 2.
